# Supplementary material for: JMJD6 modulates DNA damage response through downregulating H4K16ac independently of its enzymatic activity
Source: PubMed Central journal article supplement (PMC7206091; doi:10.1038/s41418-019-0397-3), 2019-07-29
Supplement: 41418_2019_397_MOESM1_ESM.pdf [file 41418_2019_397_MOESM1_ESM.pdf]

## **Supplementary Figure Legends**

**Supplementary Figure 1. EGFP-JMJD6 is recruited to DNA damage sites.** EGFP-JMJD6, EGFP, and mCherry-PCNA expression constructs were transfected into U2OS cells respectively, and the localization of these three proteins was observed under a fluorescence microscope following laser microirradiation. The fluorescence intensity was quantified using the software ZEN2.5 at 0.2  $\mu\text{m}$  intervals in the range of 6  $\mu\text{m}$  centered on the center of laser locus, and the fluorescence intensity curve was plotted according to the values of the scattered plots. About 80% of the cells showed significant EGFP-JMJD6 recruitment in response to laser treatment. Scale bar, 10  $\mu\text{m}$ .

**Supplementary Figure 2. JMJD6 overexpression does not change the distribution of DDR effectors in cells without IR treatment.** FLAG-JMJD6 or FLAG-Mutant expression constructs were transfected in to U2OS cells, and immunofluorescence assays were performed using anti-FLAG together with anti- $\gamma\text{H2A.X}$  (A), anti-MDC1 (B), FK2 (C), anti-RNF168 (D), anti-53BP1 (E), or anti-BRCA1 (F). (G) U2OS cells were transfected with indicated siRNAs for 72 hours and immunostained with anti- $\gamma\text{H2A.X}$  together with anti-53BP1. (H) U2OS cells transfected with the indicated siRNAs were incubated in the presence of 5-ethynyl uridin (5-EU) for the last 1 hour, and then immunostained with anti-53BP1. The 5-EU incorporation to nascent mRNA was developed with Click-iT chemistry. Scale bar in Supplementary Figure 2, 20  $\mu\text{m}$ .

**Supplementary Figure 3. JMJD6 overexpression does not decrease the protein**

**level of DNA damage response proteins.** FLAG-JMJD6 or FLAG-Mutant expression constructs were transfected into U2OS cells which were then treated with 10 Gy of IR or not. At 1 hour and 8 hours after IR treatment, cell lysates were collected and subjected to western blotting using indicated antibodies.

**Supplementary Figure 4. The modulation of DDR by JMJD6 is specific and has no cell specificity.** (A) JMJD6 overexpression does not affect the level of H2AK119ub after IR treatment. Immunofluorescence assays were performed using antibodies against FLAG together with H2AK119ub in FLAG-JMJD6 overexpressed U2OS cells at 1 hour after irradiation. Scale bar, 20  $\mu$ m. (B) The impaired 53BP1 foci formation mediated by JMJD6 overexpression is cell type independent. MCF-7 cells and A549 cells transfected with FLAG-JMJD6 or FLAG-mutant expression constructs were treated with IR, and immunofluorescence assays were performed using anti-FLAG together with anti-53BP1. Scale bar, 20  $\mu$ m. At least 50 nuclei from triplicate experiments for each group were quantified, and the *p*-value was determined by Student's *t* test. \*\*\*\* $p < 0.0001$ . (C) The effect of JMJD6 overexpression on DDR is specific. We transfected FLAG-RBB expression constructs into U2OS cells, and examined foci formation of 53BP1 after IR treatment using immunofluorescence assays. Scale bar, 20  $\mu$ m.

**Supplementary Figure 5. The knockdown effect mediated by JMJD6 shRNAs and SIRT1 shRNAs.** (A) The effect of JMJD6 knockdown by shRNAs in U2OS-DR-GFP

cells was detected by real-time RT-PCR. (B) Cell lysates of U2OS cells stably expressing JMJD6 shRNAs or control shRNAs were obtained and subjected to western blot analysis using indicated antibodies. (C) Cell lysates of U2OS cells stably expressing SIRT1 shRNAs or control shRNAs were subjected to western blot analysis using antibodies against SIRT1 and  $\beta$ -actin.

**Supplementary Figure 6. JMJD6 overexpression or knockdown does not affect the cell cycle of U2OS-DR-GFP cells.** U2OS-DR-GFP cells were transfected with control siRNAs, JMJD6 siRNAs, vector, FLAG-JMJD6, or FLAG-Mutant expression constructs, and cell cycle was analyzed by flow cytometry.

**Supplementary Figure 7. JMJD6 depletion leads to more rapid and efficient recovery from cell cycle arrest after irradiation.** U2OS cells stably expressing JMJD6 or control shRNAs were collected at indicated times after 4 Gy of IR treatment, and then subjected to propidium iodide staining and flow cytometry.

**Supplementary Figure 8. The mass spectrometry detail of LUC7L2 protein.**

**Supplementary Figure 9. JMJD6 does not catalyze lysine hydroxylation on SIRT1.** Recombinant GST-SIRT1 purified bacterially was incubated with control or FLAG-JMJD6 purified from FLAG-JMJD6-expressing 293T cells in the presence of 2OG, ascorbate, and FeNH<sub>4</sub>SO<sub>4</sub>, and then the mixture was resolved on SDS-PAGE and

Coomassie blue-stained. The protein bands representing GST-SIRT1 on the gel were retrieved and analyzed using LCMS/MS. The detailed result of LCMS/MS is supplied as Supplementary Table 1 and 2.

**Supplementary Figure 10. Overexpression of JMJD6 and its catalytic mutant decreases H4K16ac level.** The cell lysates from U2OS cells transfected with FLAG-JMJD6 or FLAG-mutant expression constructs were obtained and subjected to western blot analysis using indicated antibodies.

**Supplementary Figure 11. JMJD6 interacts with BRD4 and SIRT1 in U2OS cells under IR treatment.** (A) Immunoprecipitation assays were performed in U2OS cells treated with IR or not. (B) Immunoprecipitation assays were performed with antibodies against the indicated proteins followed by immunoblot analysis in U2OS cells.

**Supplementary Figure 12. JMJD6 overexpression does not change the distribution of 53BP1 in cells without IR treatment.** (A) U2OS cells stably expressing shRNAs specific for SIRT1 or control shRNAs were transfected with FLAG-JMJD6 expression constructs, and immunofluorescence experiments were performed using anti-FLAG together with anti-53BP1. Scale bar, 20  $\mu$ m. (B) U2OS cells were transfected with FLAG-JMJD6-N expression constructs, and immunofluorescence assays were performed using anti-FLAG together with anti-53BP1. Scale bar, 20  $\mu$ m. (C) U2OS cells transfected with FLAG-JMJD6 expression constructs were untreated or treated



with JQ1, and immunofluorescence experiments were performed using anti-FLAG together with anti-53BP1. Scale bar, 20  $\mu\text{m}$ .

**Supplementary Table 1. The detailed information of modifications on GST-SIRT1 which was incubated with control samples.**

**Supplementary Table 2. The detailed information of modifications on GST-SIRT1 which was incubated with FLAG-JMJD6.**

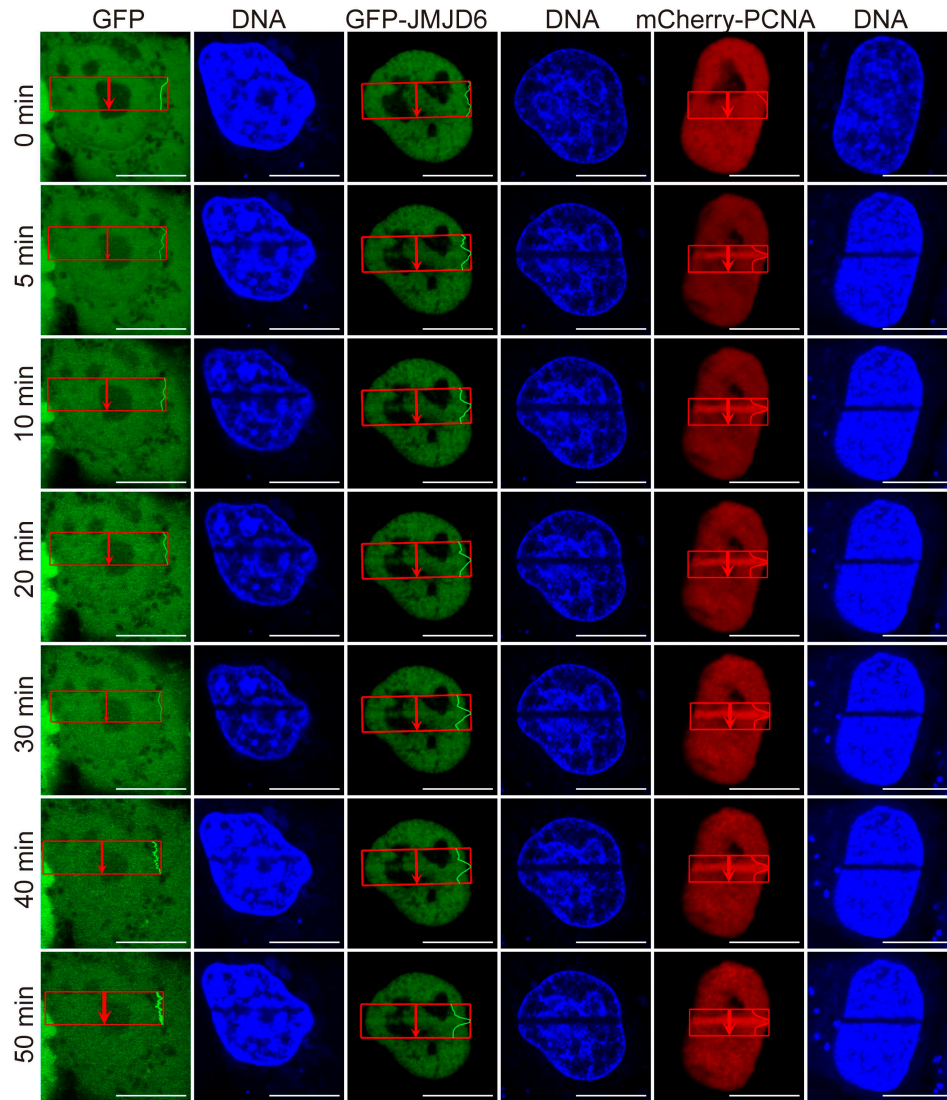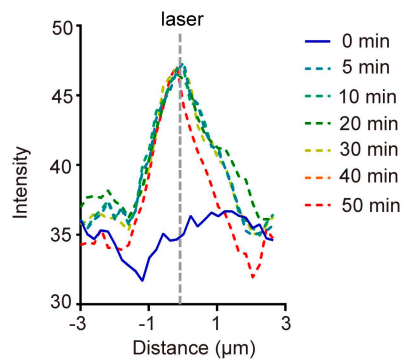

EGFP-JMJD6

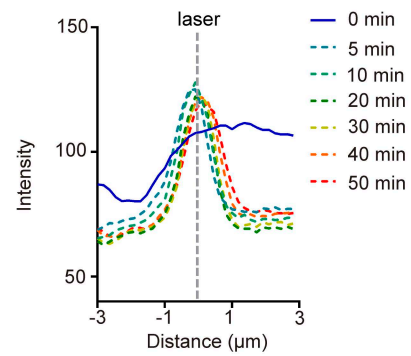

mCherry-PCNA

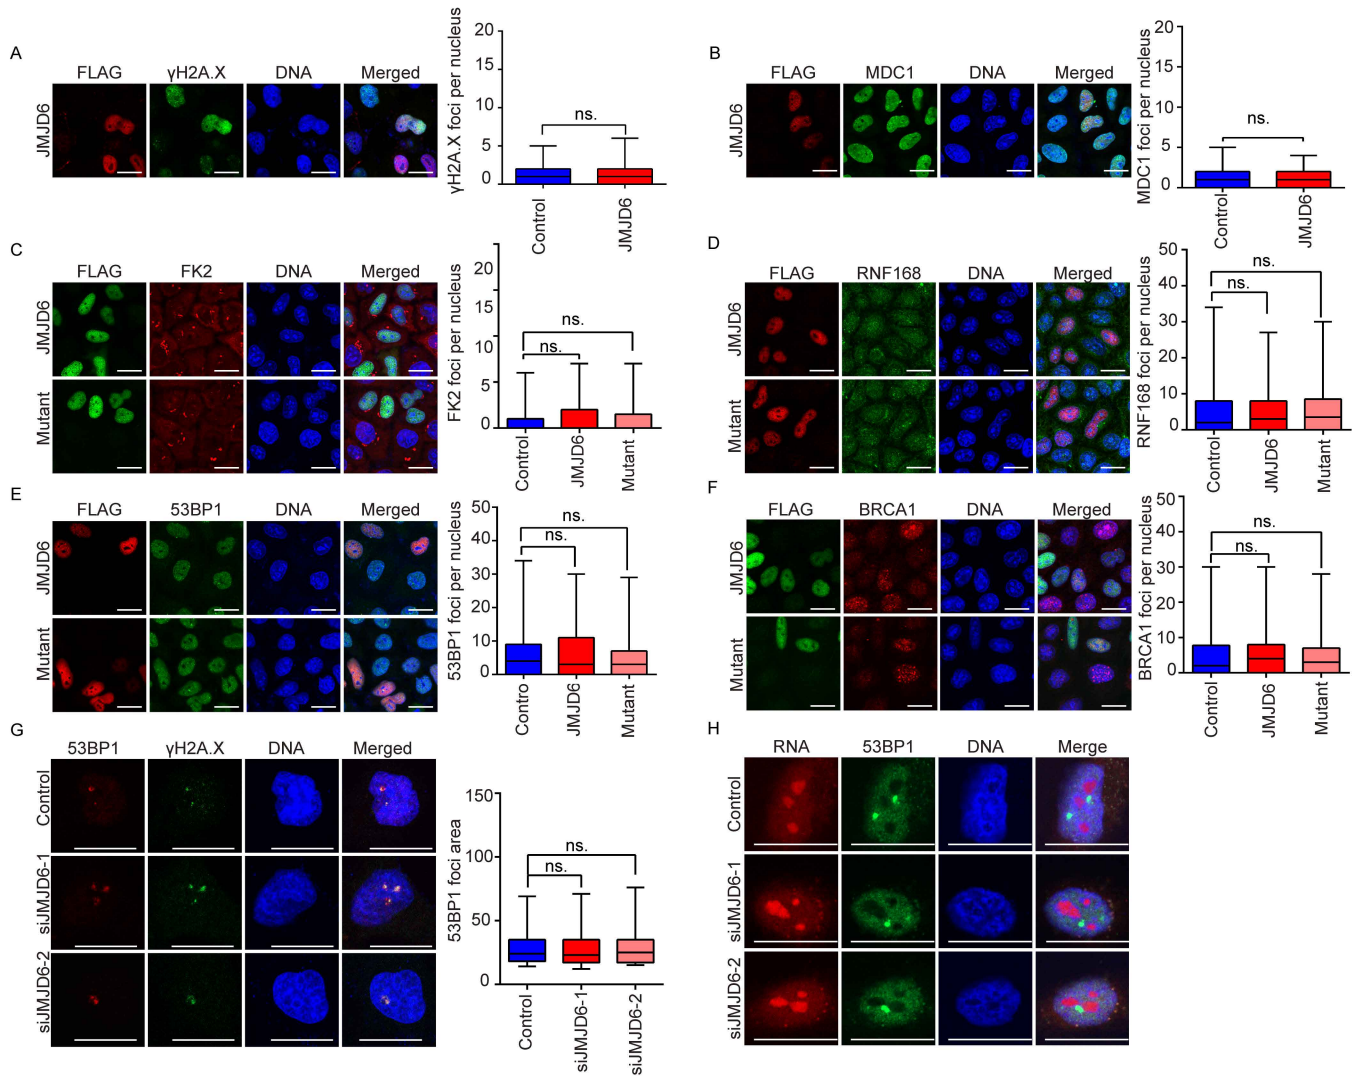

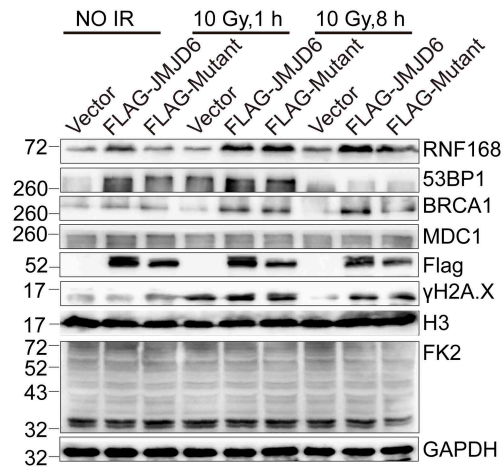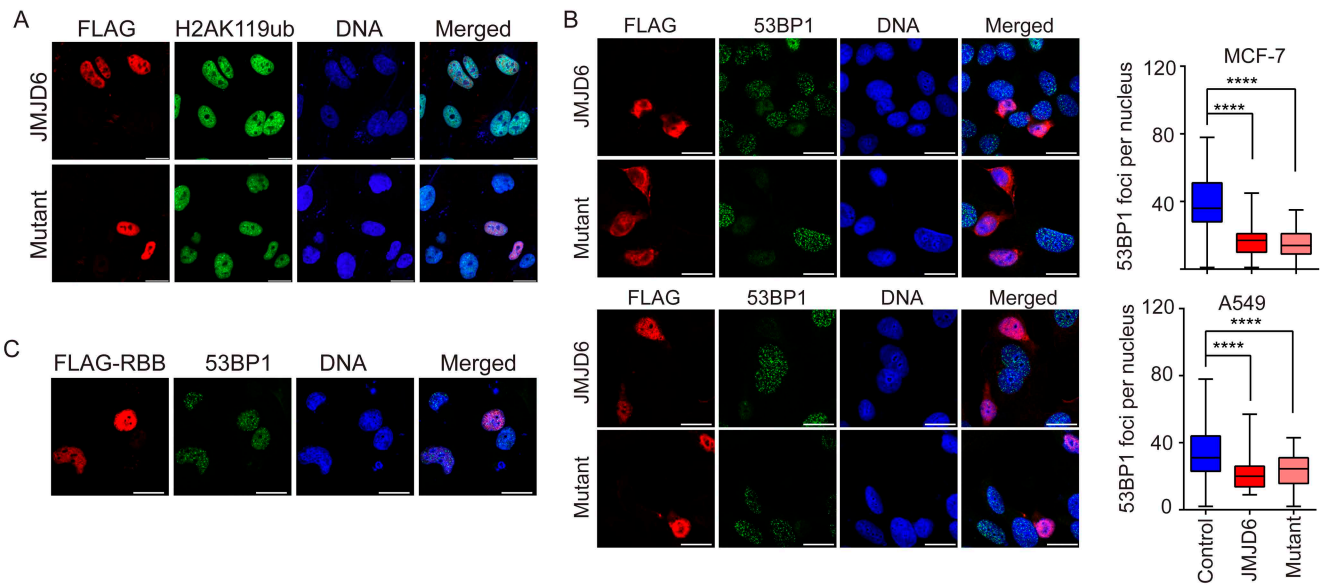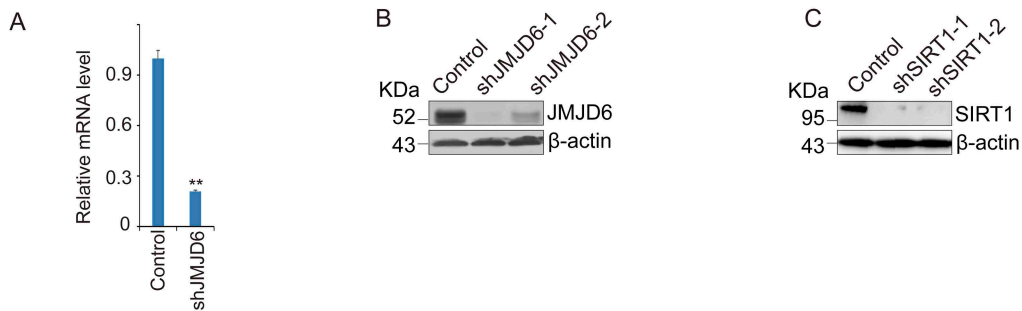

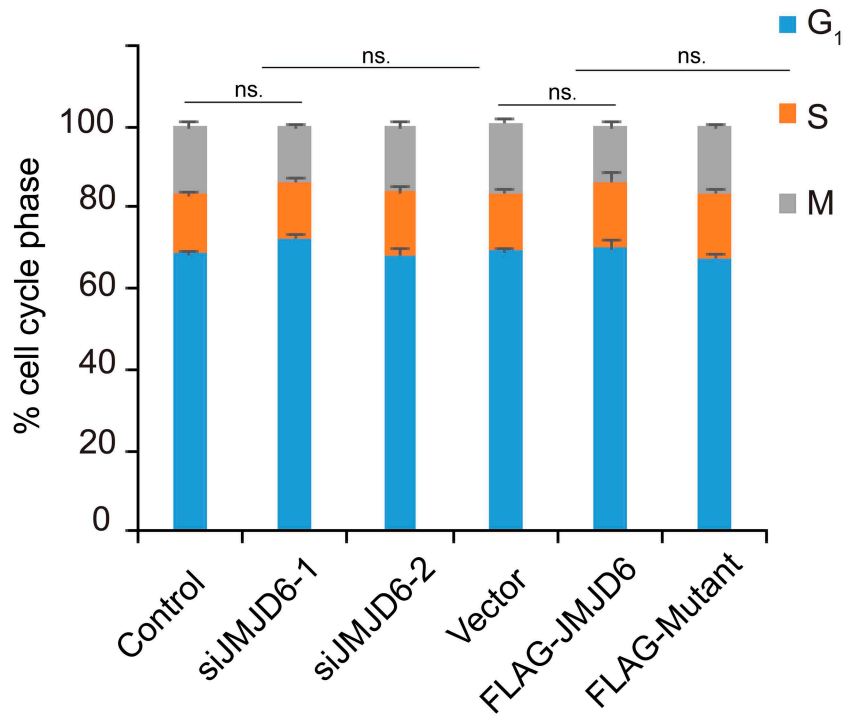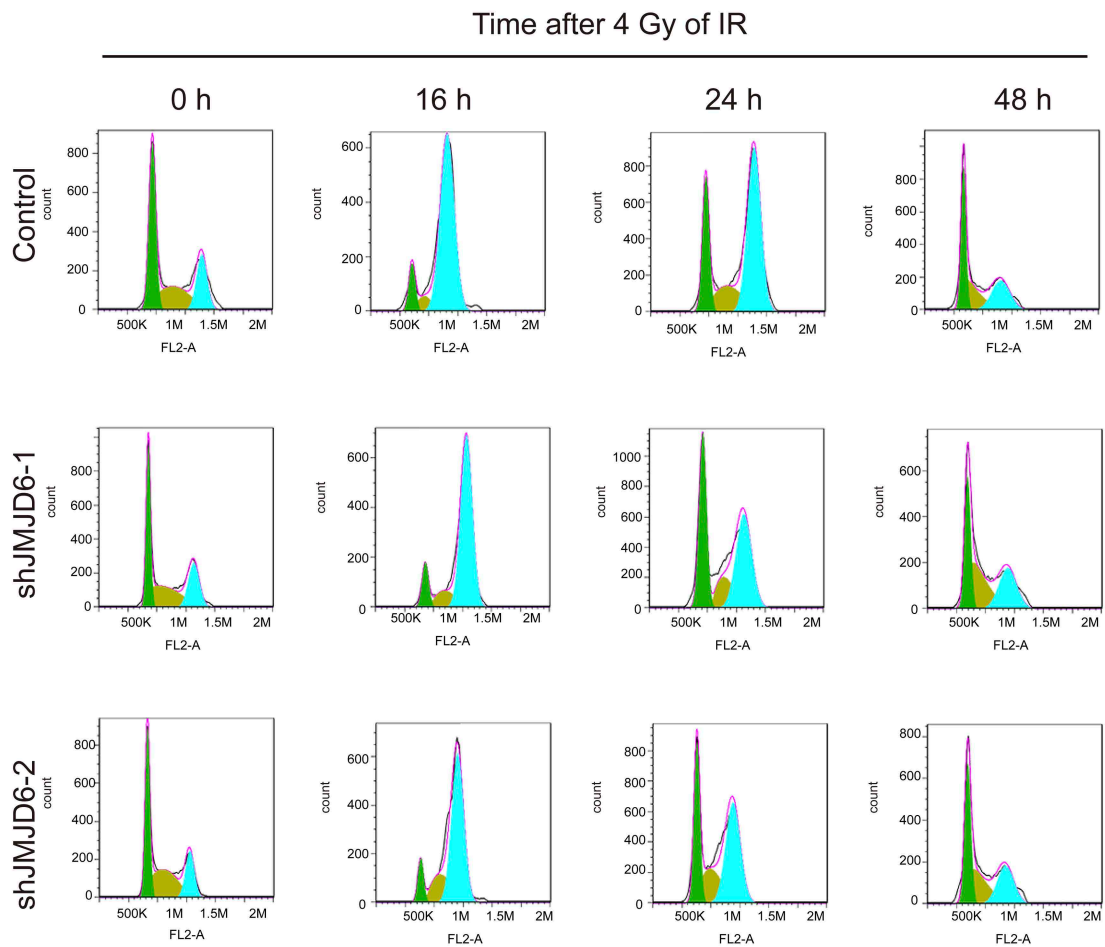

| Proteins | Unique peptides number | Unique peptides                                                                                                                                                                                                                                                                                                                                                                                                                                                                                                                                                                                                                                                                                                                                                                                                                                                                                                                                                                                                                                       |
|----------|------------------------|-------------------------------------------------------------------------------------------------------------------------------------------------------------------------------------------------------------------------------------------------------------------------------------------------------------------------------------------------------------------------------------------------------------------------------------------------------------------------------------------------------------------------------------------------------------------------------------------------------------------------------------------------------------------------------------------------------------------------------------------------------------------------------------------------------------------------------------------------------------------------------------------------------------------------------------------------------------------------------------------------------------------------------------------------------|
| LUC7L2   | 59                     | LAETQEEISAEVAAKAER<br>VEQLGAEGNVEESQKvmDEVEK<br>VEQLGAEGNVEESQKVMDEVEKAR<br>LRVcEvCsAYLGLHDNDRR<br>VEQLGAEGNVEESQKVMDEVEK<br>VcKSHLLNccPHDVLSGTR<br>aERVHELNEEIGK<br>VHELNEEIGKLLAK<br>LRVcEvCsAYLGLHDNDR<br>VcEvCsAYLGLHDNDR<br>AERVHELNEEIGKLLAK<br>SHLLNccPHDVLSGTR<br>LAETQEEISAEVAAK<br>RLAETQEEISAEVAAK<br>LADHFGGKHLGFIEIR<br>VEQLGAEGNVEESQK<br>AERVHELNEEIGK<br>sHLLNccPHDVLSGTR<br>VcEvCsAYLGLHDNDRR<br>IAETQEEISAEVAAK<br>LLAKVEQLGAEGNVEESQK<br>vcEvCsAYLGLHDNDRR<br>AMLDQLMGTSRDGDTTR<br>MDLGEcLKVHDLALR<br>FRDQDLAScDRDR<br>vEQLGAEGNVEESQK<br>FRDQDLAScDR<br>VEQLGAEGNVEESQKvmDEVEKAR<br>VHDLALRADYEIASK<br>NSMPASSFQQQK<br>VMDEVEKAR<br>VHELNEEIGK<br>AMLDQLMGTSR<br>vHELNEEIGKLLAK<br>AmLDQLMGTSR<br>IKFSDDRVcK<br>aMLDQLMGTSR<br>vHELNEEIGK<br>eKLEELKR<br>AmLDQLmGTSR<br>nSMPASSFQQQK<br>aDYEIASK<br>ADYEIASK<br>IHLGFIEIR<br>LHLGFIEIR<br>nSmPASSFQQQK<br>mDLGEcLK<br>mDLGEcLK<br>fRDQDLAScDRDR<br>mDLGEcLKVHDLALR<br>vMDEVEKAR<br>IADHFGGK<br>eAEEVYR<br>NSmPASSFQQQK<br>MDLGEcLK<br>VHDLALR<br>vMDEVEK<br>vHDLALR<br>SSEEREAGEI |

Supplementary Figure 9

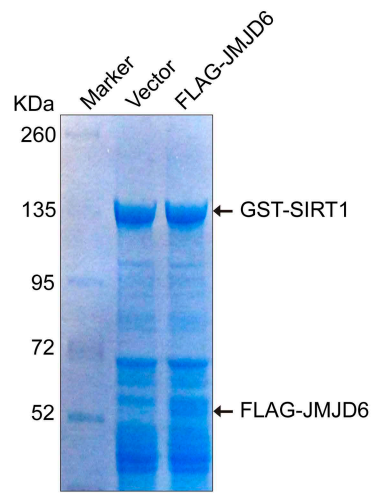

Supplementary Figure 10

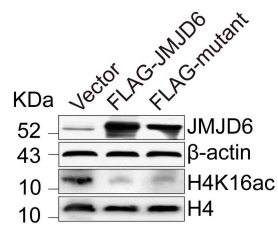

Supplementary Figure 11

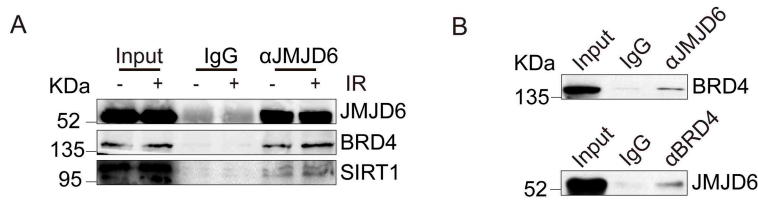

Supplementary Figure 12

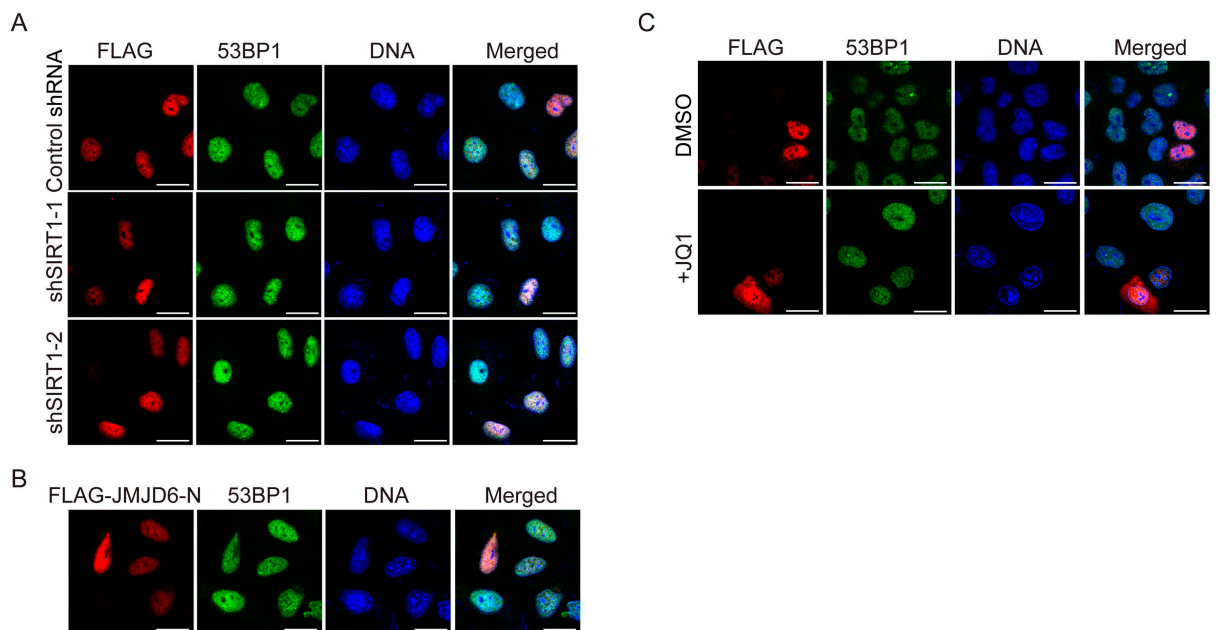

**Supplementary Table 1. The detailed information of modifications on GST-SIRT1 which was incubated with control samples.**

| Accession  | Description                                                                                   | Score   | Coverage                                                              | Proteins    | Unique Peptides | Peptides  | PSMs  | MW [kDa]       |
|------------|-----------------------------------------------------------------------------------------------|---------|-----------------------------------------------------------------------|-------------|-----------------|-----------|-------|----------------|
| Q96E<br>B6 | NAD-dependent protein deacetylase sirtuin-1 OS=Homo sapiens GN=SIRT1 PE=1 SV=2 - [SIR1_HUMAN] | 6551.98 | 78.31                                                                 | 3           | 21              | 56        | 2374  | 81.6           |
|            | Sequence                                                                                      | # PSMs  | Modifications                                                         | $\Delta$ Cn | q-Value         | PEP       | XCorr | MH+ [Da]       |
|            | AGGAGFGTDGDDQ<br>EAINEAISVK                                                                   | 66      |                                                                       | 0.0000      | 0               | 5.522E-15 | 5.99  | 2222.0<br>1933 |
|            | DNLLFGDEIITNGFH<br>ScESDEEDR                                                                  | 5       | C17(Carbamidomethyl)                                                  | 0.0000      | 0               | 8.452E-15 | 5.62  | 2812.1<br>9693 |
|            | eLAYLSELPTPLHV<br>SEDSSSPER                                                                   | 14      | N-Term(Acetyl)                                                        | 0.0000      | 0               | 6.401E-14 | 4.80  | 2695.3<br>0716 |
|            | NVESIAEQmENPDL<br>KNVGSSTGEKNER                                                               | 4       | M9(Oxidation)                                                         | 0.0000      | 0               | 1.037E-13 | 5.94  | 2991.3<br>9077 |
|            | IIQcHGFSFATAScLlc<br>K                                                                        | 8       | C4(Carbamidomethyl);<br>C13(Carbamidomethyl);<br>C16(Carbamidomethyl) | 0.0000      | 0               | 1.59E-13  | 5.84  | 1965.9<br>2900 |
|            | cPADEPLAImKPEIV<br>FFGENLPEQFHR                                                               | 117     | C1(Carbamidomethyl);<br>M10(Oxidation)                                | 0.0000      | 0               | 2.609E-13 | 5.59  | 3200.5<br>5166 |
|            | AGGAGFGTDGDDQ<br>EAINEAISVKQEV<br>DMNYPSNKS                                                   | 1       |                                                                       | 0.0000      | 0               | 4.332E-13 | 6.01  | 3715.6<br>6477 |
|            | cPADEPLAImKPEIV<br>FFGENLPEQFHR                                                               | 47      | C1(Carbamidomethyl)                                                   | 0.0000      | 0               | 5.383E-13 | 6.17  | 3184.5<br>4897 |
|            | IIVLTGAGVSVScGI<br>PDFR                                                                       | 20      | C13(Carbamidomethyl)                                                  | 0.0000      | 0               | 9.466E-13 | 4.69  | 1961.0<br>4985 |
|            | TQKELAYLSELPT<br>PLHVSEDSSSPER                                                                | 1       |                                                                       | 0.0000      | 0               | 1.438E-12 | 6.55  | 3010.5<br>0380 |
|            | AMKYDKDEVLLI<br>VIGSSLK                                                                       | 6       |                                                                       | 0.0000      | 0               | 1.856E-12 | 5.56  | 2237.2<br>0786 |
|            | SNDDLVDVSESKGcM<br>EEKPQEVQTSR                                                                | 4       | C13(Carbamidomethyl)                                                  | 0.0000      | 0               | 1.754E-11 | 4.00  | 2868.2<br>5185 |
|            | vRPVALIPSSIPHEVP<br>QILINR                                                                    | 10      | N-Term(Acetyl)                                                        | 0.0000      | 0               | 2.04E-11  | 5.36  | 2490.4<br>5473 |
|            | AmKYDKDEVLLI<br>VIGSSLK                                                                       | 25      | M2(Oxidation)                                                         | 0.0000      | 0               | 3.591E-11 | 4.39  | 2253.2<br>0157 |



|                                              |     |                                                           |        |   |           |      |                |
|----------------------------------------------|-----|-----------------------------------------------------------|--------|---|-----------|------|----------------|
| dNLLFGDEIITNGFH<br>ScESDEEDR                 | 1   | N-Term(Acetyl);<br>C17(Carbamidomethyl)                   | 0.0000 | 0 | 4.893E-11 | 4.35 | 2854.2<br>0041 |
| nYTQNIDTLEQVAGI<br>QR                        | 22  | N-Term(Acetyl)                                            | 0.0000 | 0 | 1.149E-10 | 4.76 | 2004.9<br>9126 |
| YDKDEVDLLIVIGS<br>SLK                        | 64  |                                                           | 0.0000 | 0 | 2.067E-10 | 5.84 | 1907.0<br>3594 |
| SNDDL DVSESKGcm<br>EEKPQEVQTSR               | 10  | C13(Carbamidomethyl);<br>M14(Oxidation)                   | 0.0000 | 0 | 2.323E-10 | 5.94 | 2884.2<br>5283 |
| nVESIAEQmENPDL<br>K                          | 17  | N-Term(Acetyl);<br>M9(Oxidation)                          | 0.0000 | 0 | 2.386E-10 | 4.00 | 1774.8<br>0925 |
| NVESIAEQMENPDL<br>KNVGSSTGEK                 | 1   |                                                           | 0.0000 | 0 | 2.547E-10 | 3.78 | 2576.2<br>1939 |
| AGGAGFGTDGDDQ<br>EAINEAISVKQEV<br>DmNYPSNKS  | 2   | M29(Oxidation)                                            | 0.0000 | 0 | 3.371E-10 | 6.21 | 3731.6<br>5346 |
| IGPYTFVQQLmIG<br>TDPR                        | 39  | M12(Oxidation)                                            | 0.0000 | 0 | 5.366E-10 | 3.14 | 2089.0<br>5278 |
| cPADEPLAImKPEIV<br>FFGENLPEQFHR              | 6   | N-Term(Acetyl);<br>C1(Carbamidomethyl);<br>M10(Oxidation) | 0.0000 | 0 | 7.096E-10 | 2.60 | 3242.5<br>4880 |
| GcMEEKPQEVQTSR                               | 23  | C2(Carbamidomethyl)                                       | 0.0000 | 0 | 1.194E-09 | 4.07 | 1678.7<br>4858 |
| NVESIAEQMENPDL<br>K                          | 11  |                                                           | 0.0000 | 0 | 1.246E-09 | 4.41 | 1716.8<br>0596 |
| TSPDSSVIVTLLDQ<br>AAK                        | 207 |                                                           | 0.0000 | 0 | 1.381E-09 | 4.44 | 1841.9<br>8284 |
| VRPVALIPSSIPHEV<br>PQILINR                   | 195 |                                                           | 0.0000 | 0 | 1.423E-09 | 4.96 | 2448.4<br>4160 |
| LAVDFPDLDPQAm<br>FDIEYFR                     | 2   | M14(Oxidation)                                            | 0.0000 | 0 | 1.865E-09 | 4.24 | 2515.1<br>7990 |
| tSPDSSVIVTLLDQ<br>AAK                        | 19  | N-Term(Acetyl)                                            | 0.0000 | 0 | 2.107E-09 | 3.76 | 1883.9<br>9297 |
| EPPLADNLYDEDDD<br>DEGE EEEEEAAAAI<br>GYR     | 32  |                                                           | 0.0000 | 0 | 3.266E-09 | 5.06 | 3411.4<br>0757 |
| KIIVLTGAGVSVScG<br>IPDFR                     | 2   | C14(Carbamidomethyl)                                      | 0.0000 | 0 | 6.128E-09 | 5.06 | 2089.1<br>4604 |
| eAEAEAAAAGGEQ<br>EAQATAAAGEGDN<br>GPG LQGPSR | 5   | N-Term(Acetyl)                                            | 0.0000 | 0 | 6.841E-09 | 6.04 | 3280.4<br>5083 |
| LAVDFPDLDPQAM<br>FDIEYFR                     | 3   |                                                           | 0.0000 | 0 | 3.808E-08 | 2.80 | 2499.1<br>8583 |
| NVESIAEQmENPDL<br>K                          | 31  | M9(Oxidation)                                             | 0.0000 | 0 | 6.453E-08 | 3.82 | 1732.7<br>9827 |

|  |                                             |     |                                                          |        |   |           |      |                |
|--|---------------------------------------------|-----|----------------------------------------------------------|--------|---|-----------|------|----------------|
|  | FIALSDKEGKLLR                               | 4   |                                                          | 0.0000 | 0 | 7.361E-08 | 3.62 | 1489.8<br>7241 |
|  | RKDINTIEDAVK                                | 26  |                                                          | 0.0000 | 0 | 1.181E-07 | 4.35 | 1401.7<br>6856 |
|  | AGGAGFGTDGDDQ<br>EAINEAISVKQEV<br>DmNYPSNK  | 2   | M29(Oxidation)                                           | 0.0000 | 0 | 1.284E-07 | 4.22 | 3644.6<br>2856 |
|  | IGPYTFVQQHLMIG<br>TDPR                      | 27  |                                                          | 0.0000 | 0 | 1.859E-07 | 4.78 | 2073.0<br>5596 |
|  | rLDGNQYLFLPPNR                              | 22  | N-Term(Acetyl)                                           | 0.0000 | 0 | 2.21E-07  | 4.38 | 1744.9<br>1178 |
|  | gcMEEKPQEVQTSR                              | 4   | N-Term(Acetyl);<br>C2(Carbamidomethyl)                   | 0.0000 | 0 | 2.312E-07 | 3.50 | 1720.7<br>6218 |
|  | qEVTDMNYPSNK                                | 9   | N-Term(Acetyl)                                           | 0.0000 | 0 | 5.384E-07 | 2.99 | 1467.6<br>3909 |
|  | mADEAALALQPGG<br>SPSAAGADR                  | 4   | M1(Oxidation)                                            | 0.0000 | 0 | 5.791E-07 | 4.89 | 2071.9<br>6708 |
|  | gcmEEEKPQEVQTSR                             | 6   | N-Term(Acetyl);<br>C2(Carbamidomethyl);<br>M3(Oxidation) | 0.0000 | 0 | 5.947E-07 | 2.80 | 1736.7<br>5425 |
|  | aMKYDKDEVLLIV<br>IGSSLK                     | 1   | N-Term(Acetyl)                                           | 0.0000 | 0 | 7.671E-07 | 4.60 | 2279.2<br>1767 |
|  | QEVTDmNYPSNK                                | 19  | M6(Oxidation)                                            | 0.0000 | 0 | 1.397E-06 | 3.62 | 1441.6<br>2517 |
|  | ELAYLSELPTPLH<br>VSEDSSSPER                 | 123 |                                                          | 0.0000 | 0 | 1.442E-06 | 5.51 | 2653.2<br>9653 |
|  | QEVTDmNYPSNK                                | 10  |                                                          | 0.0000 | 0 | 1.798E-06 | 3.61 | 1425.6<br>2944 |
|  | MADEAALALQPGG<br>SPSAAGADR                  | 3   |                                                          | 0.0000 | 0 | 1.818E-06 | 3.74 | 2055.9<br>7501 |
|  | EAEAEAAAAGGEQ<br>EAQATAAAGEGDN<br>GPGLQGPSR | 47  |                                                          | 0.0000 | 0 | 2.941E-06 | 6.90 | 3238.4<br>4007 |
|  | LSEITEKPPR                                  | 88  |                                                          | 0.0000 | 0 | 3.34E-06  | 3.64 | 1169.6<br>5180 |
|  | GcmEEEKPQEVQTSR                             | 10  | C2(Carbamidomethyl);<br>M3(Oxidation)                    | 0.0000 | 0 | 3.41E-06  | 3.44 | 1694.7<br>4985 |
|  | KDINTIEDAVK                                 | 16  |                                                          | 0.0000 | 0 | 3.656E-06 | 4.92 | 1245.6<br>6619 |
|  | nVESIAEQMENPDL<br>K                         | 6   | N-Term(Acetyl)                                           | 0.0000 | 0 | 4.776E-06 | 3.81 | 1758.8<br>1767 |
|  | EAASSPAGEPLRK                               | 9   |                                                          | 0.0000 | 0 | 4.893E-06 | 2.93 | 1312.6<br>8454 |
|  | yDKDEVLLIVIGSS                              | 2   | N-Term(Acetyl)                                           | 0.0000 | 0 | 5.01E-06  | 3.00 | 1949.0         |

|                             |     |                                        |  |        |   |               |      |                |
|-----------------------------|-----|----------------------------------------|--|--------|---|---------------|------|----------------|
| LK                          |     |                                        |  |        |   |               |      | 4288           |
| SPGEPGGAAPEREV<br>PAAAR     | 3   |                                        |  | 0.0000 | 0 | 5.331E-06     | 3.73 | 1818.9<br>0818 |
| qEVTdMNYPSNK                | 5   | N-Term(Acetyl);<br>M6(Oxidation)       |  | 0.0000 | 0 | 5.845E-06     | 2.91 | 1483.6<br>3445 |
| NVGSSTGEKNER                | 3   |                                        |  | 0.0000 | 0 | 8.062E-06     | 2.15 | 1277.6<br>0776 |
| SNDDL DVSESK                | 13  |                                        |  | 0.0000 | 0 | 1.035E-05     | 3.16 | 1208.5<br>2800 |
| LDGNQYLFLPPNR               | 22  |                                        |  | 0.0000 | 0 | 1.268E-05     | 3.44 | 1546.7<br>9827 |
| kDINTIEDAVK                 | 7   | N-Term(Acetyl)                         |  | 0.0000 | 0 | 1.384E-05     | 4.73 | 1287.6<br>7546 |
| gcPGAAAAALWR                | 2   | N-Term(Acetyl);<br>C2(Carbamidomethyl) |  | 0.0000 | 0 | 1.741E-05     | 2.22 | 1242.6<br>0503 |
| qEVTDMNYPSNKS               | 2   | N-Term(Acetyl)                         |  | 0.0000 | 0 | 0.000018<br>8 | 3.40 | 1554.6<br>7131 |
| FAKEIYPGQFQPSLc<br>HK       | 1   | C15(Carbamidomethyl)                   |  | 0.0000 | 0 | 1.888E-05     | 3.07 | 2050.0<br>2097 |
| aGGAGFGTDGDDQ<br>EAINEAISVK | 14  | N-Term(Acetyl)                         |  | 0.0000 | 0 | 2.217E-05     | 4.90 | 2264.0<br>2567 |
| QEVTDMNYPSNKS               | 11  |                                        |  | 0.0000 | 0 | 2.957E-05     | 3.35 | 1512.6<br>6106 |
| eAASSPAGEPLRK               | 12  | N-Term(Acetyl)                         |  | 0.0000 | 0 | 3.123E-05     | 3.76 | 1354.6<br>9434 |
| fIALSDKEGK                  | 10  | N-Term(Acetyl)                         |  | 0.0000 | 0 | 3.143E-05     | 2.36 | 1149.6<br>1457 |
| rKDINTIEDAVK                | 6   | N-Term(Acetyl)                         |  | 0.0000 | 0 | 3.849E-05     | 3.83 | 1443.7<br>7973 |
| qEVTdMNYPSNKS               | 5   | N-Term(Acetyl);<br>M6(Oxidation)       |  | 0.0000 | 0 | 5.399E-05     | 2.83 | 1570.6<br>6606 |
| RLDGNQYLFLPPNR              | 127 |                                        |  | 0.0000 | 0 | 5.715E-05     | 4.74 | 1702.9<br>0427 |
| GcPGAAAAALWR                | 8   | C2(Carbamidomethyl)                    |  | 0.0000 | 0 | 6.608E-05     | 3.79 | 1200.5<br>9269 |
| SPGEPGGAAPER                | 9   |                                        |  | 0.0000 | 0 | 8.366E-05     | 2.74 | 1124.5<br>3276 |
| FIALSDKEGK                  | 39  |                                        |  | 0.0000 | 0 | 0.000085<br>6 | 2.55 | 1107.6<br>0376 |
| ISEITEKPPR                  | 43  | N-Term(Acetyl)                         |  | 0.0000 | 0 | 0.0001108     | 3.35 | 1211.6<br>6130 |
| amKYDKDEVLLIV<br>IGSSLK     | 6   | N-Term(Acetyl);<br>M2(Oxidation)       |  | 0.0000 | 0 | 0.0001112     | 3.60 | 2295.2<br>1132 |

|  |                                                |     |                                                                |        |   |               |      |                |
|--|------------------------------------------------|-----|----------------------------------------------------------------|--------|---|---------------|------|----------------|
|  | sNDDLdVSESK                                    | 15  | N-Term(Acetyl)                                                 | 0.0000 | 0 | 0.0001151     | 3.00 | 1250.5<br>3691 |
|  | eAASSPAGEPLR                                   | 13  | N-Term(Acetyl)                                                 | 0.0000 | 0 | 0.000255<br>6 | 3.41 | 1226.5<br>9966 |
|  | YKVDcEAVR                                      | 16  | C5(Carbamidomethyl)                                            | 0.0000 | 0 | 0.000256<br>2 | 3.14 | 1139.5<br>4999 |
|  | NYTQNIDTLEQVAG<br>IQR                          | 95  |                                                                | 0.0000 | 0 | 0.000282      | 4.61 | 1962.9<br>8403 |
|  | EAASSPAGEPLR                                   | 30  |                                                                | 0.0000 | 0 | 0.000391<br>7 | 3.33 | 1184.5<br>9075 |
|  | iGPYTFVQQHLMIG<br>TDPR                         | 2   | N-Term(Acetyl)                                                 | 0.0000 | 0 | 0.000402<br>2 | 1.54 | 2115.0<br>6841 |
|  | DINTIEDAVK                                     | 100 |                                                                | 0.0000 | 0 | 0.000689<br>5 | 2.76 | 1117.5<br>7585 |
|  | LLQEeKK                                        | 2   | C5(Carbamidomethyl)                                            | 0.0000 | 0 | 0.000723<br>7 | 2.14 | 918.50<br>699  |
|  | DNLLFGDEIITNGFH<br>ScESDEEDRASHAS<br>SSDWTPRPR | 1   | C17(Carbamidomethyl)                                           | 0.0000 | 0 | 0.000756      | 5.09 | 4347.9<br>0113 |
|  | GDIFNQVVPR                                     | 92  |                                                                | 0.0000 | 0 | 0.000805<br>8 | 3.18 | 1144.6<br>1057 |
|  | dINTIEDAVK                                     | 28  | N-Term(Acetyl)                                                 | 0.0000 | 0 | 0.000846<br>6 | 2.74 | 1159.5<br>8367 |
|  | IDGNQYLFLPPNR                                  | 2   | N-Term(Acetyl)                                                 | 0.0000 | 0 | 0.001448      | 3.47 | 1588.8<br>1235 |
|  | rDGPGLER                                       | 2   | N-Term(Acetyl)                                                 | 0.0000 | 0 | 0.00237       | 2.46 | 941.47<br>887  |
|  | QEVTDmNYPSNKS                                  | 20  | M6(Oxidation)                                                  | 0.0000 | 0 | 0.003457      | 3.27 | 1528.6<br>5300 |
|  | iGPYTFVQQHLMIG<br>TDPR                         | 6   | N-Term(Acetyl);<br>M12(Oxidation)                              | 0.0000 | 0 | 0.00352       | 2.03 | 2131.0<br>6125 |
|  | DPRPFFK                                        | 11  |                                                                | 0.0000 | 0 | 0.004142      | 2.43 | 906.48<br>099  |
|  | DGIYAR                                         | 4   |                                                                | 0.0000 | 0 | 0.005339      | 1.68 | 694.35<br>124  |
|  | lccNPVK                                        | 8   | N-Term(Acetyl);<br>C2(Carbamidomethyl);<br>C3(Carbamidomethyl) | 0.0000 | 0 | 0.005528      | 1.94 | 932.43<br>260  |
|  | gDIFNQVVPR                                     | 15  | N-Term(Acetyl)                                                 | 0.0000 | 0 | 0.00724       | 3.08 | 1186.6<br>1991 |
|  | EIYPGQFQPSLcHK                                 | 27  | C12(Carbamidomethyl)                                           | 0.0000 | 0 | 0.008582      | 3.34 | 1703.8<br>2155 |
|  | eIYPGQFQPSLcHK                                 | 7   | N-Term(Acetyl);<br>C12(Carbamidomethyl)                        | 0.0000 | 0 | 0.01277       | 2.29 | 1745.8<br>2694 |

|  |             |    |                |        |       |         |      |                |
|--|-------------|----|----------------|--------|-------|---------|------|----------------|
|  | fIALSDK     | 2  | N-Term(Acetyl) | 0.0000 | 0.001 | 0.018   | 1.71 | 835.45<br>537  |
|  | FIALSDK     | 13 |                | 0.0000 | 0.001 | 0.02786 | 2.13 | 793.44<br>560  |
|  | kDPRPFFK    | 3  | N-Term(Acetyl) | 0.0000 | 0.002 | 0.04568 | 1.63 | 1076.5<br>8753 |
|  | KDPRPFFKFAK | 1  |                | 0.0000 | 0.003 | 0.094   | 1.45 | 1380.7<br>7834 |

**Supplementary Table 2. The detailed information of modifications on GST-SIRT1 which was incubated with FLAG-JMJD6.**

| Accession | Description                                                                                   | Score   | Coverage                                                        | Proteins    | Unique Peptides | Peptides      | PSMs  | MW [kDa]       |
|-----------|-----------------------------------------------------------------------------------------------|---------|-----------------------------------------------------------------|-------------|-----------------|---------------|-------|----------------|
| Q96E B6   | NAD-dependent protein deacetylase sirtuin-1 OS=Homo sapiens GN=SIRT1 PE=1 SV=2 - [SIR1_HUMAN] | 7850.79 | 84.47                                                           | 4           | 63              | 63            | 2737  | 81.6           |
|           | Sequence                                                                                      | # PSMs  | Modifications                                                   | $\Delta$ Cn | q-Value         | PEP           | XCorr | MH+ [Da]       |
|           | AMKYDKDEVLLI VIGSSLK                                                                          | 30      |                                                                 | 0.0000      | 0               | 7.102E-07     | 6.58  | 2237.2<br>0293 |
|           | SNDDL DVSESKGcM EEKPQEVQTSR                                                                   | 4       | C13(Carbamidomethyl)                                            | 0.0000      | 0               | 1.21E-06      | 5.87  | 2868.2<br>5980 |
|           | TQKELAYLSELPPT PLHVSEDSSSPER                                                                  | 2       |                                                                 | 0.0000      | 0               | 4.352E-06     | 7.09  | 3010.5<br>0966 |
|           | AGGAGFGTDGDDQ EAINEAISVKQEVTD MNYPNSK                                                         | 2       |                                                                 | 0.0000      | 0               | 4.888E-06     | 6.44  | 3628.6<br>1643 |
|           | NVESIAEQMENPDL KNVGSSTGEK                                                                     | 1       |                                                                 | 0.0000      | 0               | 6.557E-06     | 4.26  | 2576.2<br>1372 |
|           | DNLLFGDEIITNGFH ScESDEEDR                                                                     | 4       | C17(Carbamidomethyl)                                            | 0.0000      | 0               | 6.767E-06     | 6.08  | 2812.1<br>9217 |
|           | IIQcHGSFATAScLlc K                                                                            | 8       | C4(Carbamidomethyl); C13(Carbamidomethyl); C16(Carbamidomethyl) | 0.0000      | 0               | 0.000010<br>6 | 6.46  | 1965.9<br>2974 |
|           | YDKDEVLLIVIGS SLK                                                                             | 97      |                                                                 | 0.0000      | 0               | 1.531E-05     | 5.55  | 1907.0<br>3386 |
|           | IGPYTFVQQHLmIG TDPR                                                                           | 18      | M12(Oxidation)                                                  | 0.0000      | 0               | 2.659E-05     | 3.79  | 2089.0<br>5132 |
|           | EAEAEAAAAGGEQ                                                                                 | 59      |                                                                 | 0.0000      | 0               | 2.921E-05     | 6.80  | 3238.4         |

|                                              |     |                                         |        |   |               |      |  |                |
|----------------------------------------------|-----|-----------------------------------------|--------|---|---------------|------|--|----------------|
| EAQATAAAGEGDN<br>GPGQLQGPSR                  |     |                                         |        |   |               |      |  | 4375           |
| ELAYLSELPTPLH<br>VSEDSSSPER                  | 113 |                                         | 0.0000 | 0 | 3.755E-05     | 5.78 |  | 2653.2<br>8847 |
| cPADEPLAIMKPEIV<br>FFGENLPEQFHR              | 83  | C1(Carbamidomethyl)                     | 0.0000 | 0 | 4.034E-05     | 5.76 |  | 3184.5<br>5044 |
| NVESIAEQmENPDL<br>KNVGSSTGEKNER              | 2   | M9(Oxidation)                           | 0.0000 | 0 | 5.548E-05     | 6.36 |  | 2991.3<br>9069 |
| VRPVALIPSSIPHEV<br>PQILINR                   | 185 |                                         | 0.0000 | 0 | 6.274E-05     | 4.98 |  | 2448.4<br>4450 |
| nYTQNIDTLEQVAGI<br>QR                        | 26  | N-Term(Acetyl)                          | 0.0000 | 0 | 7.584E-05     | 4.82 |  | 2004.9<br>9346 |
| eAEAEAAAAGGEQ<br>EAQATAAAGEGDN<br>GPGQLQGPSR | 8   | N-Term(Acetyl)                          | 0.0000 | 0 | 7.598E-05     | 6.13 |  | 3280.4<br>5571 |
| eLAYLSELPTPLHV<br>SEDSSSPER                  | 16  | N-Term(Acetyl)                          | 0.0000 | 0 | 8.065E-05     | 4.48 |  | 2695.3<br>0057 |
| IIVLTGAGVSVScGI<br>PDFR                      | 127 | C13(Carbamidomethyl)                    | 0.0000 | 0 | 8.116E-05     | 4.74 |  | 1961.0<br>4839 |
| yDKDEVDLLIVIGSS<br>LK                        | 12  | N-Term(Acetyl)                          | 0.0000 | 0 | 9.433E-05     | 4.63 |  | 1949.0<br>4228 |
| KIIVLTGAGVSVScG<br>IPDFR                     | 27  | C14(Carbamidomethyl)                    | 0.0000 | 0 | 0.000170<br>8 | 5.49 |  | 2089.1<br>5068 |
| IGPYTFVQQHLMIG<br>TDPR                       | 88  |                                         | 0.0000 | 0 | 0.000186<br>2 | 4.88 |  | 2073.0<br>5351 |
| vRPVALIPSSIPHEVP<br>QILINR                   | 16  | N-Term(Acetyl)                          | 0.0000 | 0 | 0.000216<br>1 | 4.96 |  | 2490.4<br>4887 |
| IAVDFPDLDPQAM<br>FDIEYFR                     | 7   | N-Term(Acetyl)                          | 0.0000 | 0 | 0.000250<br>4 | 3.98 |  | 2541.1<br>9571 |
| SNDDL DVSESKGcm<br>EEKPQEVQTSR               | 8   | C13(Carbamidomethyl);<br>M14(Oxidation) | 0.0000 | 0 | 0.000276<br>9 | 6.49 |  | 2884.2<br>5234 |
| aGGAGFGTDGDDQ<br>EAINEAISVK                  | 17  | N-Term(Acetyl)                          | 0.0000 | 0 | 0.000296<br>9 | 4.89 |  | 2264.0<br>3301 |
| GcMEEKPQEVQTSR                               | 37  | C2(Carbamidomethyl)                     | 0.0000 | 0 | 0.000297<br>2 | 4.23 |  | 1678.7<br>4761 |
| LAVDFPDLDPQAM<br>FDIEYFRK                    | 2   |                                         | 0.0000 | 0 | 0.000326<br>9 | 3.84 |  | 2627.2<br>8037 |
| nVESIAEQmENPDL<br>K                          | 17  | N-Term(Acetyl);<br>M9(Oxidation)        | 0.0000 | 0 | 0.000337<br>1 | 4.37 |  | 1774.8<br>1511 |
| NVESIAEQMENPDL<br>K                          | 47  |                                         | 0.0000 | 0 | 0.000366      | 4.15 |  | 1716.8<br>0828 |
| RLDGNQYLFLPPNR                               | 125 |                                         | 0.0000 | 0 | 0.000423<br>1 | 4.92 |  | 1702.8<br>9946 |
| nVESIAEQMENPDL                               | 17  | N-Term(Acetyl)                          | 0.0000 | 0 | 0.000465      | 4.54 |  | 1758.8         |

|  |                                        |     |                                                          |        |   |               |      |                |
|--|----------------------------------------|-----|----------------------------------------------------------|--------|---|---------------|------|----------------|
|  | K                                      |     |                                                          |        |   | 1             |      | 2097           |
|  | iIVLTGAGVSVScGIP<br>DFR                | 2   | N-Term(Acetyl);<br>C13(Carbamidomethyl)                  | 0.0000 | 0 | 0.000566<br>9 | 3.92 | 2003.0<br>6266 |
|  | NVGSSTGEKNER                           | 4   |                                                          | 0.0000 | 0 | 0.000651<br>6 | 2.50 | 1277.6<br>0776 |
|  | tSPDSSVIVTLLDQ<br>AAK                  | 30  | N-Term(Acetyl)                                           | 0.0000 | 0 | 0.000662<br>2 | 4.18 | 1883.9<br>9321 |
|  | AGGAGFGTDGDDQ<br>EAINEAISVK            | 97  |                                                          | 0.0000 | 0 | 0.000706<br>8 | 5.96 | 2222.0<br>2018 |
|  | EPPLADNLYDEDDD<br>DEGEEEEAAAAAI<br>GYR | 32  |                                                          | 0.0000 | 0 | 0.000742<br>4 | 5.04 | 3411.3<br>9760 |
|  | LAVDFPDLDPQAM<br>FDIEYFR               | 16  |                                                          | 0.0000 | 0 | 0.000809<br>5 | 3.81 | 2499.1<br>8528 |
|  | DEVDLLIVIGSSLK                         | 3   |                                                          | 0.0000 | 0 | 0.000969<br>9 | 3.72 | 1500.8<br>4795 |
|  | NVESIAEQmENPDL<br>K                    | 26  | M9(Oxidation)                                            | 0.0000 | 0 | 0.001004      | 3.36 | 1732.8<br>0217 |
|  | AmKYDKDEVLLI<br>VIGSSLK                | 61  | M2(Oxidation)                                            | 0.0000 | 0 | 0.001062      | 4.27 | 2253.2<br>0376 |
|  | TSPDSSVIVTLLDQ<br>AAK                  | 174 |                                                          | 0.0000 | 0 | 0.001124      | 4.37 | 1841.9<br>7966 |
|  | gcMEEKPQEVQTSR                         | 12  | N-Term(Acetyl);<br>C2(Carbamidomethyl)                   | 0.0000 | 0 | 0.001257      | 3.58 | 1720.7<br>5835 |
|  | ISEITEKPPR                             | 64  | N-Term(Acetyl)                                           | 0.0000 | 0 | 0.001281      | 3.30 | 1211.6<br>6132 |
|  | GcmEEEKPQEVQTSR                        | 15  | C2(Carbamidomethyl);<br>M3(Oxidation)                    | 0.0000 | 0 | 0.001313      | 3.71 | 1694.7<br>4527 |
|  | LAVDFPDLDPQAm<br>FDIEYFR               | 12  | M14(Oxidation)                                           | 0.0000 | 0 | 0.001437      | 3.73 | 2515.1<br>8045 |
|  | gcmEEEKPQEVQTSR                        | 7   | N-Term(Acetyl);<br>C2(Carbamidomethyl);<br>M3(Oxidation) | 0.0000 | 0 | 0.001554      | 3.07 | 1736.7<br>5663 |
|  | EPLPHLHFDVELLG<br>DcDVIINELcHR         | 2   | C16(Carbamidomethyl);<br>C24(Carbamidomethyl)            | 0.0000 | 0 | 0.001601      | 4.66 | 3140.5<br>1748 |
|  | eAASSPAGEPLRK                          | 17  | N-Term(Acetyl)                                           | 0.0000 | 0 | 0.001672      | 3.76 | 1354.6<br>9233 |
|  | KDINTIEDAVK                            | 12  |                                                          | 0.0000 | 0 | 0.001713      | 5.02 | 1245.6<br>6545 |
|  | iGPYTFVQQHLMIG<br>TDPR                 | 12  | N-Term(Acetyl)                                           | 0.0000 | 0 | 0.001907      | 3.65 | 2115.0<br>6890 |
|  | kDINTIEDAVK                            | 8   | N-Term(Acetyl)                                           | 0.0000 | 0 | 0.002158      | 4.71 | 1287.6<br>7571 |
|  | rKDINTIEDAVK                           | 10  | N-Term(Acetyl)                                           | 0.0000 | 0 | 0.002459      | 3.38 | 1443.7         |

|                                             |    |                                                            |        |   |          |      |                |      |
|---------------------------------------------|----|------------------------------------------------------------|--------|---|----------|------|----------------|------|
|                                             |    |                                                            |        |   |          |      |                | 8009 |
| AGGAGFGTDGDDQ<br>EAINEAISVKQEV<br>DmNYPSNKS | 1  | M29(Oxidation)                                             | 0.0000 | 0 | 0.002844 | 4.28 | 3731.6<br>3857 |      |
| mADEAALALQPGG<br>SPSAAGADR                  | 2  | M1(Oxidation)                                              | 0.0000 | 0 | 0.002868 | 3.63 | 2071.9<br>6946 |      |
| LSEITEKPPR                                  | 73 |                                                            | 0.0000 | 0 | 0.003301 | 3.69 | 1169.6<br>5125 |      |
| sNDDLVDVSESK                                | 21 | N-Term(Acetyl)                                             | 0.0000 | 0 | 0.003383 | 2.93 | 1250.5<br>3703 |      |
| rLDGNQYLFLPPNR                              | 55 | N-Term(Acetyl)                                             | 0.0000 | 0 | 0.003384 | 4.38 | 1744.9<br>1050 |      |
| LAVDFPDLDPQAm<br>FDIEYFRK                   | 1  | M14(Oxidation)                                             | 0.0000 | 0 | 0.003551 | 4.14 | 2643.2<br>7610 |      |
| IAVDFPDLDPQAm<br>FDIEYFR                    | 3  | N-Term(Acetyl);<br>M14(Oxidation)                          | 0.0000 | 0 | 0.003745 | 4.63 | 2557.1<br>8540 |      |
| FIALSDKEGKLLR                               | 5  |                                                            | 0.0000 | 0 | 0.003962 | 3.57 | 1489.8<br>7259 |      |
| sNDDLVDVSESKGcm<br>EEKPQEVQTSR              | 3  | N-Term(Acetyl);<br>C13(Carbamidomethyl);<br>M14(Oxidation) | 0.0000 | 0 | 0.004237 | 3.58 | 2926.2<br>5991 |      |
| aMKYDKDEVLLIV<br>IGSSLK                     | 2  | N-Term(Acetyl)                                             | 0.0000 | 0 | 0.00466  | 4.18 | 2279.2<br>1645 |      |
| MADEAALALQPGG<br>SPSAAGADR                  | 1  |                                                            | 0.0000 | 0 | 0.005578 | 4.17 | 2055.9<br>7446 |      |
| QEVTDmNYPSNK                                | 14 | M6(Oxidation)                                              | 0.0000 | 0 | 0.00561  | 3.52 | 1441.6<br>2370 |      |
| NVGSSTGEKNERTS<br>VAGTVR                    | 2  |                                                            | 0.0000 | 0 | 0.005975 | 4.49 | 2049.0<br>2724 |      |
| LDGNQYLFLPPNR                               | 20 |                                                            | 0.0000 | 0 | 0.006403 | 3.31 | 1546.7<br>9875 |      |
| GcPGAAAAALWR                                | 6  | C2(Carbamidomethyl)                                        | 0.0000 | 0 | 0.006884 | 3.57 | 1200.5<br>9186 |      |
| EAASSPAGEPLRK                               | 8  |                                                            | 0.0000 | 0 | 0.007069 | 2.96 | 1312.6<br>8463 |      |
| YKVDcEAVR                                   | 20 | C5(Carbamidomethyl)                                        | 0.0000 | 0 | 0.007615 | 3.66 | 1139.5<br>5036 |      |
| QEVTDmNYPSNK                                | 14 |                                                            | 0.0000 | 0 | 0.007645 | 3.64 | 1425.6<br>2871 |      |
| SNDDLVDVSESK                                | 11 |                                                            | 0.0000 | 0 | 0.008592 | 3.34 | 1208.5<br>2678 |      |
| qEVTDmNYPSNK                                | 4  | N-Term(Acetyl)                                             | 0.0000 | 0 | 0.008661 | 3.20 | 1467.6<br>3652 |      |
| nVGSSTGEKNER                                | 1  | N-Term(Acetyl)                                             | 0.0000 | 0 | 0.009582 | 1.48 | 1319.6         |      |



|  |                                 |    |                                         |        |   |         |      |                |
|--|---------------------------------|----|-----------------------------------------|--------|---|---------|------|----------------|
|  |                                 |    |                                         |        |   |         |      | 1774           |
|  | qEVTDMNYPNSKS                   | 6  | N-Term(Acetyl)                          | 0.0000 | 0 | 0.01017 | 3.21 | 1554.6<br>7266 |
|  | IDGNQYLFLPPNR                   | 5  | N-Term(Acetyl)                          | 0.0000 | 0 | 0.01022 | 3.81 | 1588.8<br>1059 |
|  | FIALSDKEGK                      | 38 |                                         | 0.0000 | 0 | 0.01042 | 2.86 | 1107.6<br>0349 |
|  | SPGEPGGAAPER                    | 6  |                                         | 0.0000 | 0 | 0.01082 | 2.99 | 1124.5<br>3252 |
|  | IGPYTFVQQHLMIG<br>TDPRTILK      | 1  |                                         | 0.0000 | 0 | 0.01101 | 3.31 | 2528.3<br>6709 |
|  | qEVTDMNYPNSK                    | 4  | N-Term(Acetyl);<br>M6(Oxidation)        | 0.0000 | 0 | 0.01165 | 2.63 | 1483.6<br>3078 |
|  | QEVTDMNYPNSKS                   | 16 |                                         | 0.0000 | 0 | 0.01205 | 3.57 | 1512.6<br>6167 |
|  | aSHASSDWTTPRPR                  | 5  | N-Term(Acetyl)                          | 0.0000 | 0 | 0.01216 | 3.81 | 1596.7<br>4904 |
|  | NYTQNIDTLEQVAG<br>IQR           | 62 |                                         | 0.0000 | 0 | 0.01244 | 4.80 | 1962.9<br>9111 |
|  | qEVTDMNYPNSKS                   | 4  | N-Term(Acetyl);<br>M6(Oxidation)        | 0.0000 | 0 | 0.01388 | 2.84 | 1570.6<br>6789 |
|  | cPADEPLAIMKPEIV<br>FFGENLPEQFHR | 1  | N-Term(Acetyl);<br>C1(Carbamidomethyl)  | 0.0000 | 0 | 0.01531 | 3.20 | 3226.5<br>6232 |
|  | eAASSPAGEPLR                    | 16 | N-Term(Acetyl)                          | 0.0000 | 0 | 0.01698 | 3.39 | 1226.5<br>9868 |
|  | GDIFNQVVPR                      | 82 |                                         | 0.0000 | 0 | 0.01698 | 3.12 | 1144.6<br>0865 |
|  | iGPYTFVQQHLMIG<br>TDPR          | 9  | N-Term(Acetyl);<br>M12(Oxidation)       | 0.0000 | 0 | 0.01754 | 2.30 | 2131.0<br>6206 |
|  | EIYPGQFQPSLcHK                  | 26 | C12(Carbamidomethyl)                    | 0.0000 | 0 | 0.02114 | 3.00 | 1703.8<br>1778 |
|  | gDIFNQVVPR                      | 21 | N-Term(Acetyl)                          | 0.0000 | 0 | 0.0225  | 2.84 | 1186.6<br>1894 |
|  | rDGGLER                         | 4  | N-Term(Acetyl)                          | 0.0000 | 0 | 0.02274 | 2.65 | 941.47<br>936  |
|  | eIYPGQFQPSLcHK                  | 14 | N-Term(Acetyl);<br>C12(Carbamidomethyl) | 0.0000 | 0 | 0.02371 | 2.34 | 1745.8<br>2914 |
|  | amKYDKDEVDLLIV<br>IGSSLK        | 2  | N-Term(Acetyl);<br>M2(Oxidation)        | 0.0000 | 0 | 0.02382 | 3.14 | 2295.2<br>2085 |
|  | tSVAGTVR                        | 3  | N-Term(Acetyl)                          | 0.0000 | 0 | 0.0239  | 1.51 | 832.45<br>079  |
|  | gcPGAAAAALWR                    | 1  | N-Term(Acetyl);<br>C2(Carbamidomethyl)  | 0.0000 | 0 | 0.02707 | 1.84 | 1242.6<br>0381 |

|  |                                 |    |                                                                |        |   |         |      |                |
|--|---------------------------------|----|----------------------------------------------------------------|--------|---|---------|------|----------------|
|  | DINTIEDAVK                      | 71 |                                                                | 0.0000 | 0 | 0.03046 | 2.86 | 1117.5<br>7146 |
|  | RKDINTIEDAVK                    | 21 |                                                                | 0.0000 | 0 | 0.03197 | 4.32 | 1401.7<br>6746 |
|  | fIALSDKEGK                      | 15 | N-Term(Acetyl)                                                 | 0.0000 | 0 | 0.03202 | 2.64 | 1149.6<br>1338 |
|  | dINTIEDAVK                      | 27 | N-Term(Acetyl)                                                 | 0.0000 | 0 | 0.03599 | 2.66 | 1159.5<br>8281 |
|  | EAASSPAGEPLR                    | 30 |                                                                | 0.0000 | 0 | 0.03927 | 3.22 | 1184.5<br>8867 |
|  | LLQEcKK                         | 1  | C5(Carbamidomethyl)                                            | 0.0000 | 0 | 0.04009 | 2.16 | 918.50<br>672  |
|  | DPRPFfK                         | 9  |                                                                | 0.0000 | 0 | 0.04576 | 2.53 | 906.48<br>081  |
|  | cPADEPLAImKPEIV<br>FFGENLPEQFHR | 5  | N-Term(Acetyl);<br>C1(Carbamidomethyl);<br>M10(Oxidation)      | 0.0000 | 0 | 0.05126 | 2.97 | 3242.5<br>8144 |
|  | SPGEPGGAAPEREV<br>PAAAR         | 1  |                                                                | 0.0000 | 0 | 0.06035 | 2.71 | 1818.9<br>0818 |
|  | dPRPFfK                         | 1  | N-Term(Acetyl)                                                 | 0.0000 | 0 | 0.06988 | 1.71 | 948.49<br>152  |
|  | sPGEPGGAAPER                    | 1  | N-Term(Acetyl)                                                 | 0.0000 | 0 | 0.07272 | 1.46 | 1166.5<br>4314 |
|  | QEVTDmNYPSNKS                   | 17 | M6(Oxidation)                                                  | 0.0000 | 0 | 0.07735 | 2.97 | 1528.6<br>5801 |
|  | SRDGIYAR                        | 3  |                                                                | 0.0000 | 0 | 0.09829 | 2.61 | 937.48<br>363  |
|  | lccNPVK                         | 8  | N-Term(Acetyl);<br>C2(Carbamidomethyl);<br>C3(Carbamidomethyl) | 0.0000 | 0 | 0.09868 | 1.95 | 932.43<br>218  |
